# Supplementary material for: Defining the genetic susceptibility to cervical neoplasia—A genome-wide association study
Source: PLOS journal article supplement (doi:10.1371/journal.pgen.1006866), 2017-08-14
Supplement: S16 (10.1371/journal.pgen.1006866.s016) [file journal.pgen.1006866.s016]

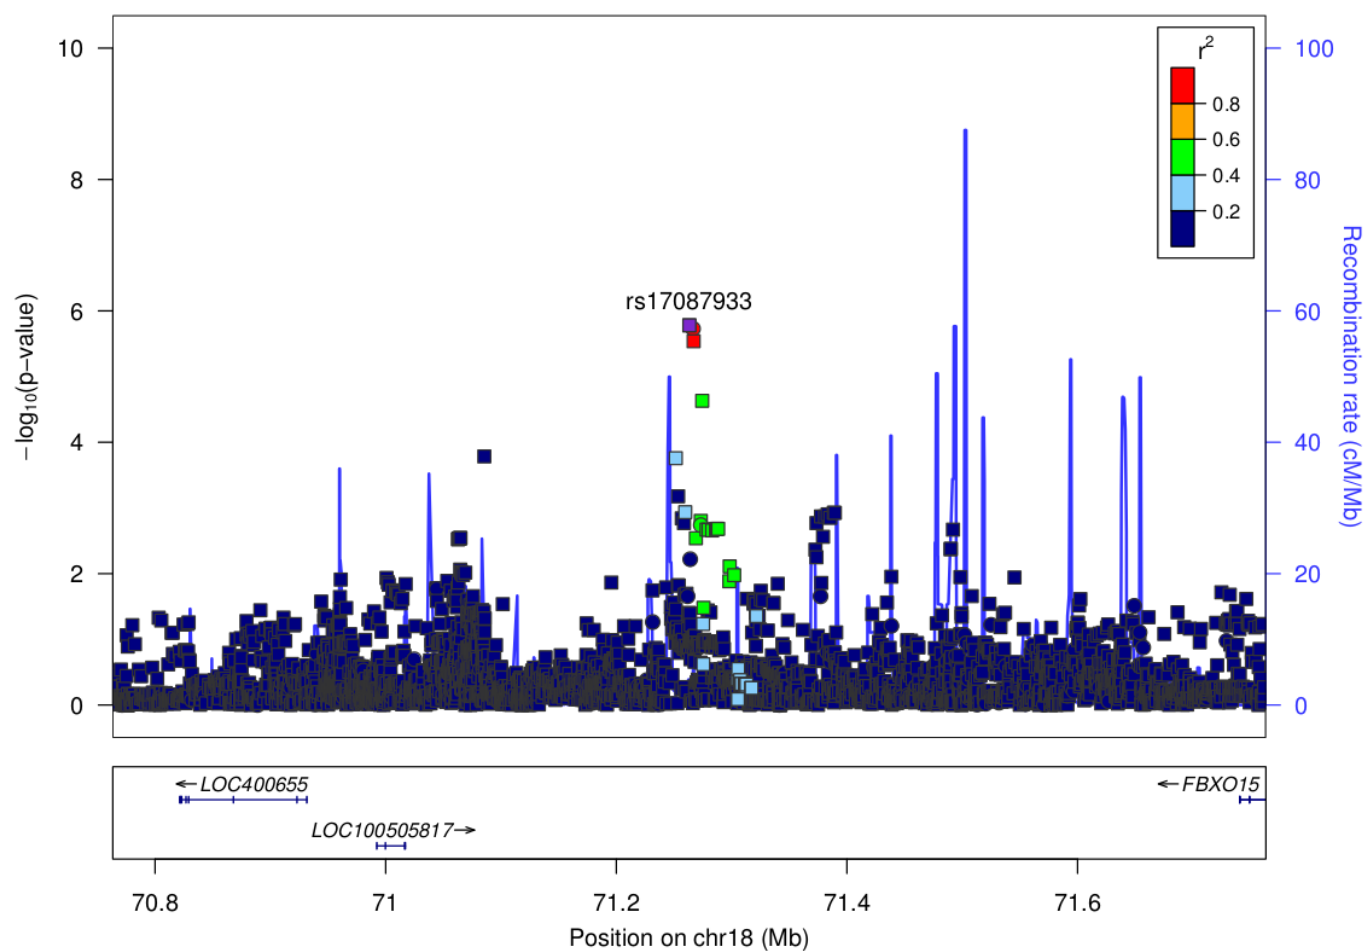

**Supplementary Figure S12.** Zoom plot for suggestive SNP rs17087933 association with cervical neoplasia.
